# Supplementary material for: Testing the Impact of Depressive and Anxiety Features on the Association between Attention-Deficit/Hyperactivity Disorder Symptoms and Academic Performance among University Students: A Mediation Analysis
Source: MDPI journal article supplement (doi:10.3390/brainsci12091155), 2022-08-30
Supplement: s1 [file s1]

**Figure S1.** Flowchart of data analysis.

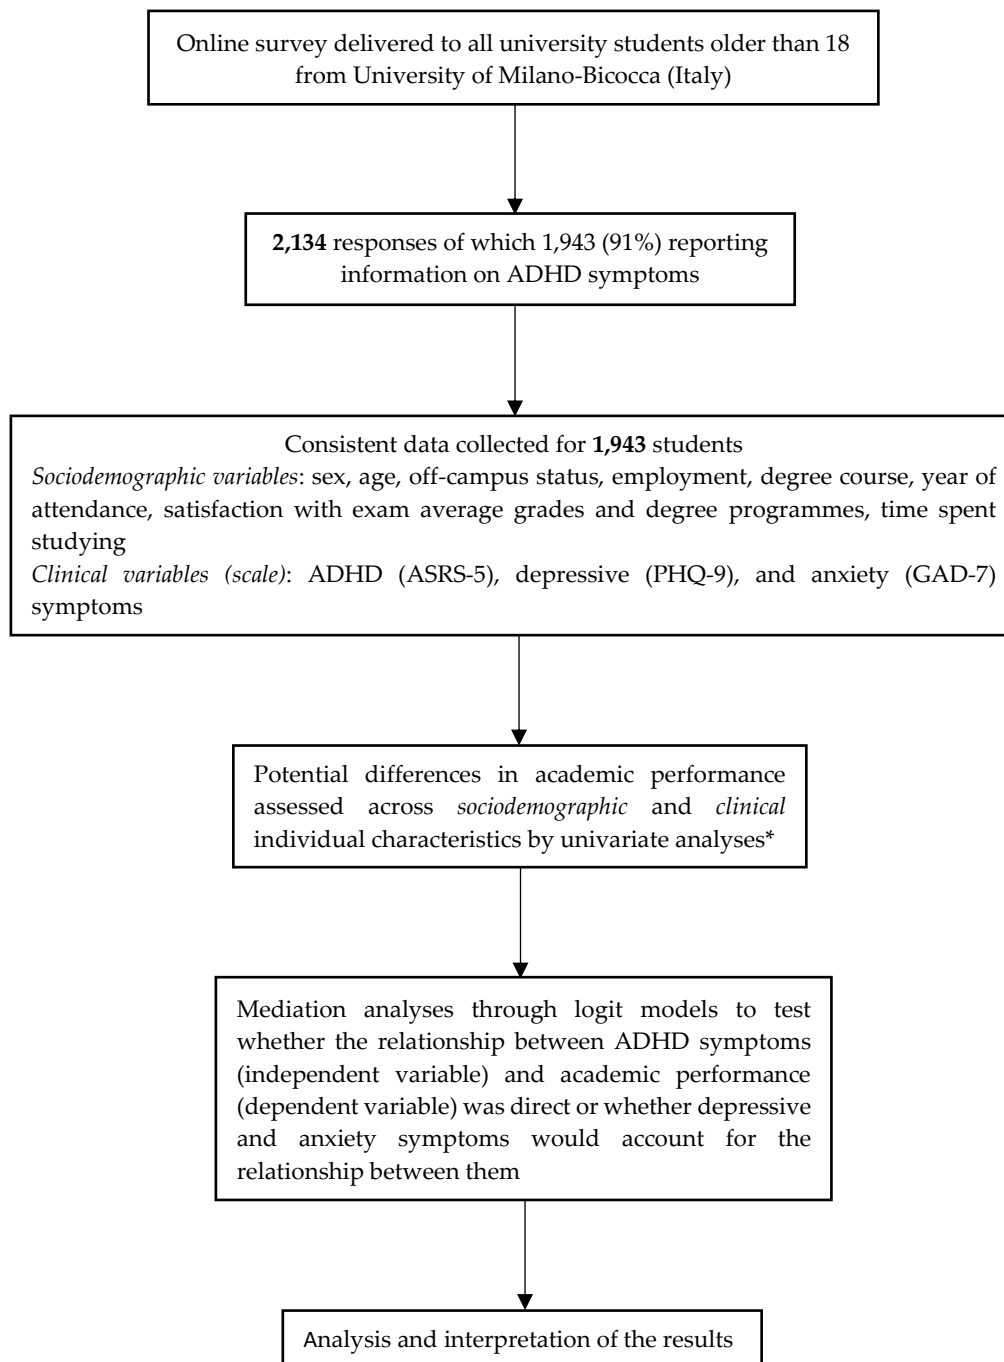

\* Pearson's chi-square test for categorical variables and parametric (e.g., Student's t test, analysis of variance) or non-parametric (e.g., Wilcoxon-Mann-Whitney test) analyses for continuous variables
